# Supplementary material for: Detecting adaptive introgression in human evolution using convolutional neural networks
Source: eLife journal article supplement (doi:10.7554/elife.64669), 2021-05-25
Supplement: supp [file elife-64669-supp-v1.zip]

Archive with 45 entries (45 files):
- elife_poa_e64669_Transparent_Reporting_File.pdf
- elife_poa_e64669_Figure_1_figure_supplement_1.pdf
- elife_poa_e64669_Figure_1_figure_supplement_2.pdf
- elife_poa_e64669_Figure_2_figure_supplement_1.pdf
- elife_poa_e64669_Figure_2_figure_supplement_2.pdf
- elife_poa_e64669_Figure_4_figure_supplement_1.pdf
- elife_poa_e64669_Figure_4_figure_supplement_2.pdf
- elife_poa_e64669_Figure_4_figure_supplement_3.pdf
- elife_poa_e64669_Figure_4_figure_supplement_4.pdf
- elife_poa_e64669_Appendix_4_figure_1.pdf
- elife_poa_e64669_Appendix_4_figure_2.pdf
- elife_poa_e64669_Appendix_4_figure_3.pdf
- elife_poa_e64669_Appendix_4_figure_4.pdf
- elife_poa_e64669_Appendix_4_figure_5.pdf
- elife_poa_e64669_Appendix_4_figure_6.pdf
- elife_poa_e64669_Appendix_4_figure_7.pdf
- elife_poa_e64669_Appendix_4_figure_8.pdf
- elife_poa_e64669_Appendix_4_figure_9.pdf
- elife_poa_e64669_Appendix_4_figure_10.pdf
- elife_poa_e64669_Appendix_4_figure_11.pdf
- elife_poa_e64669_Appendix_4_figure_12.pdf
- elife_poa_e64669_Appendix_4_figure_13.pdf
- elife_poa_e64669_Appendix_4_figure_14.pdf
- elife_poa_e64669_Appendix_5_figure_1.pdf
- elife_poa_e64669_Appendix_5_figure_2.pdf
- elife_poa_e64669_Appendix_5_figure_3.pdf
- elife_poa_e64669_Appendix_5_figure_4.pdf
- elife_poa_e64669_Appendix_5_figure_5.pdf
- elife_poa_e64669_Appendix_5_figure_6.pdf
- elife_poa_e64669_Appendix_5_figure_7.pdf
- elife_poa_e64669_Appendix_5_figure_8.pdf
- elife_poa_e64669_Appendix_5_figure_9.pdf
- elife_poa_e64669_Appendix_5_figure_10.pdf
- elife_poa_e64669_Appendix_5_figure_11.pdf
- elife_poa_e64669_Appendix_5_figure_12.pdf
- elife_poa_e64669_Appendix_5_figure_13.pdf
- elife_poa_e64669_Appendix_5_figure_14.pdf
- elife_poa_e64669_Appendix_5_figure_15.pdf
- elife_poa_e64669_Appendix_5_figure_16.pdf
- elife_poa_e64669_Appendix_5_figure_17.pdf
- elife_poa_e64669_Appendix_5_figure_18.pdf
- elife_poa_e64669_Appendix_5_figure_19.pdf
- elife_poa_e64669_Appendix_5_figure_20.pdf
- elife_poa_e64669_Appendix_5_figure_21.pdf
- elife_poa_e64669_Appendix_5_figure_22.pdf
