# Supplementary material for: Detecting adaptive introgression in human evolution using convolutional neural networks
Source: eLife journal article supplement (doi:10.7554/elife.64669), 2021-05-25

4:41980001-42080000

42078342

SNP position

41980120

Minor/Minor

Major/Minor

Major/Major

Genotype

NeaA

DenA

Melanesian

Individuals

YRI

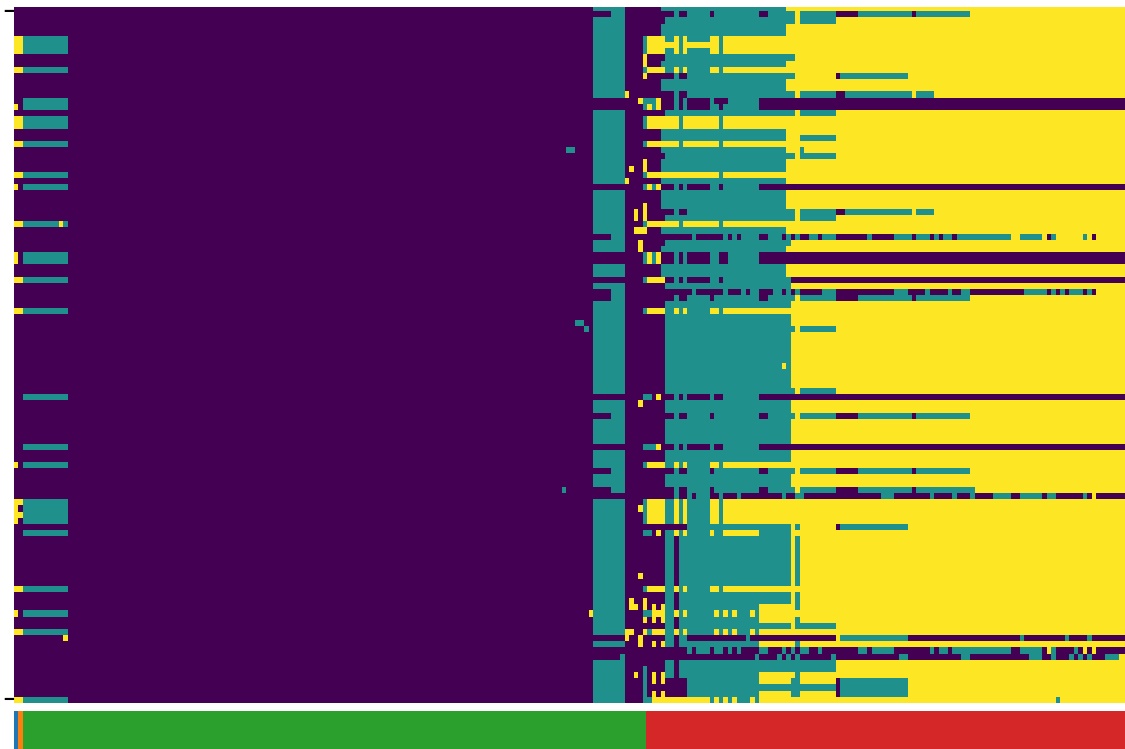

Supplement: supp [file elife-64669-supp-v1.zip › elife_poa_e64669_Appendix_5_figure_3.pdf]
