# Supplementary material for: Detecting adaptive introgression in human evolution using convolutional neural networks
Source: eLife journal article supplement (doi:10.7554/elife.64669), 2021-05-25

6:137920001-138120000

138118915

SNP position

137920217

Minor/Minor

Major/Minor

Major/Major

Genotype

NeaA  
DenA

Melanesian

YRI

Individuals

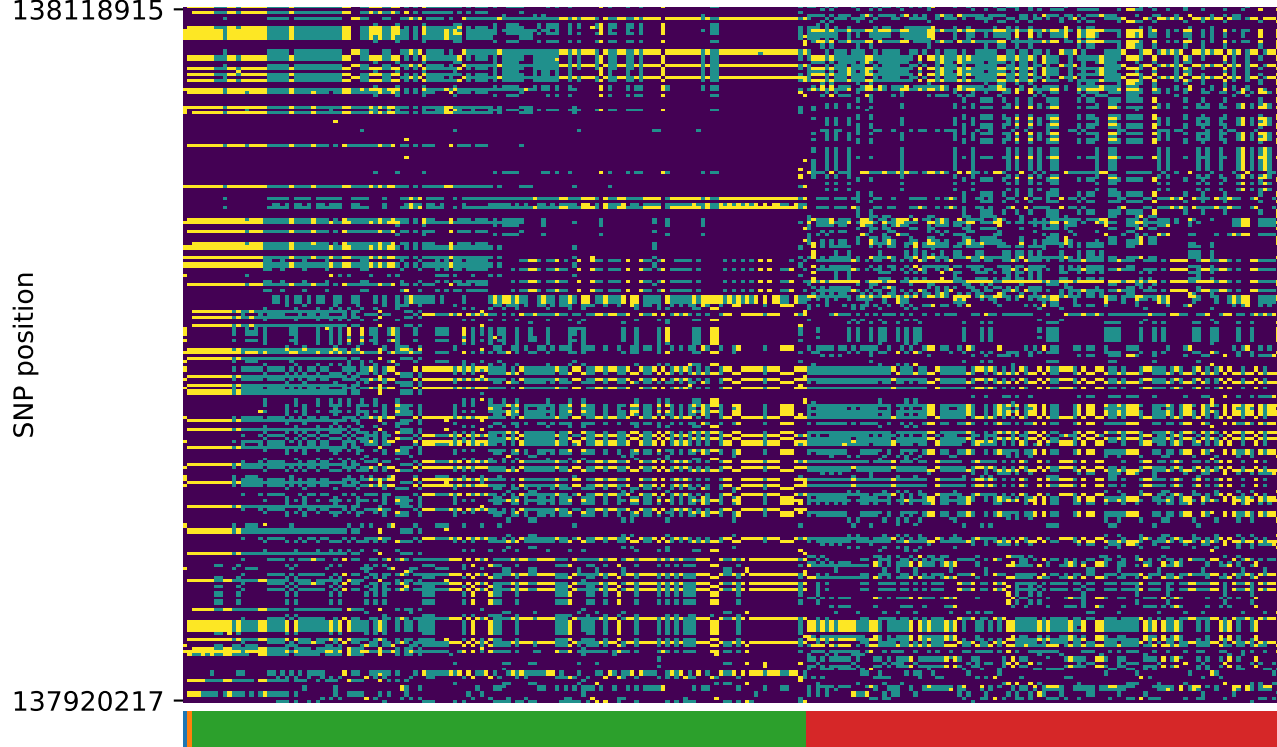

Supplement: supp [file elife-64669-supp-v1.zip › elife_poa_e64669_Appendix_5_figure_7.pdf]
