# Supplementary material for: Detecting adaptive introgression in human evolution using convolutional neural networks
Source: eLife journal article supplement (doi:10.7554/elife.64669), 2021-05-25

7:38020001-38120000

38118313

SNP position

38020845

Minor/Minor

Major/Minor

Major/Major

Genotype

NeaA

DenA

Melanesian

YRI

Individuals

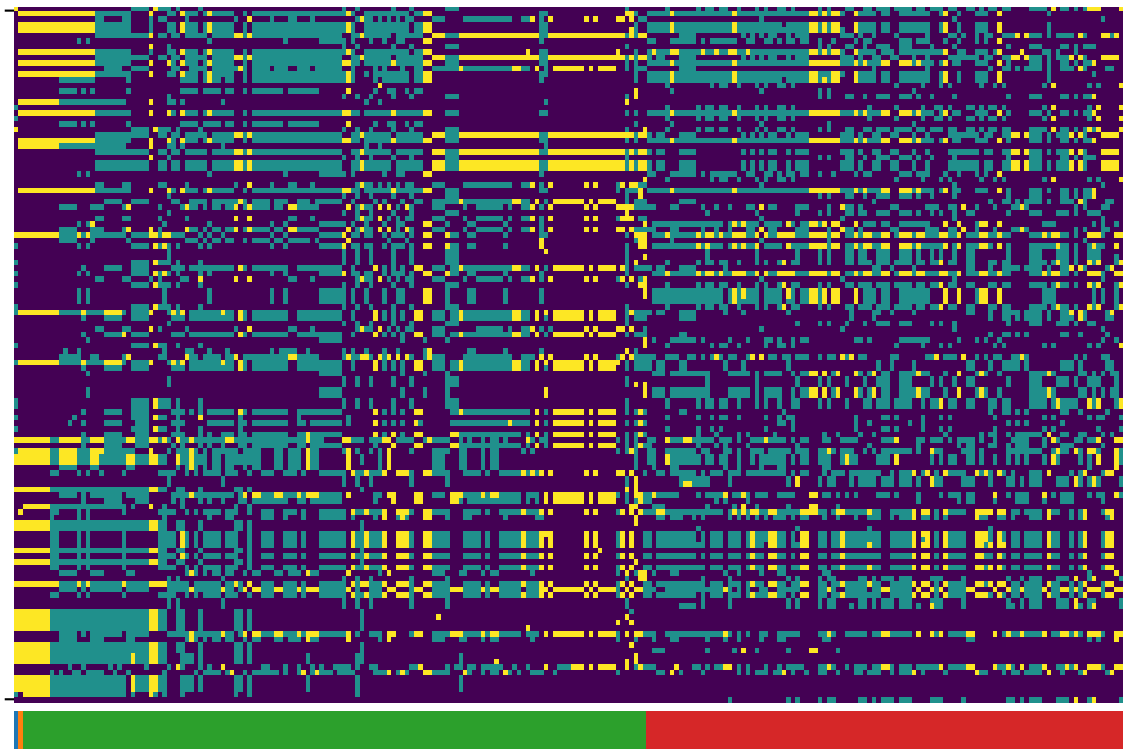

Supplement: supp [file elife-64669-supp-v1.zip › elife_poa_e64669_Appendix_5_figure_9.pdf]
