# Supplementary material for: Detecting adaptive introgression in human evolution using convolutional neural networks
Source: eLife journal article supplement (doi:10.7554/elife.64669), 2021-05-25

8:3040001-3140000

3139503

SNP position

3041502

Minor/Minor

Major/Minor

Major/Major

Genotype

Melanesian

YRI

NeaA

DenA

Individuals

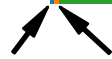

Supplement: supp [file elife-64669-supp-v1.zip › elife_poa_e64669_Appendix_5_figure_11.pdf]
