# Supplementary material for: Detecting adaptive introgression in human evolution using convolutional neural networks
Source: eLife journal article supplement (doi:10.7554/elife.64669), 2021-05-25
Supplement: supp [file elife-64669-supp-v1.zip › elife_poa_e64669_Figure_2_figure_supplement_2.pdf]

condition negative:  
neutral

condition negative:  
sweep

condition negative:  
DFE

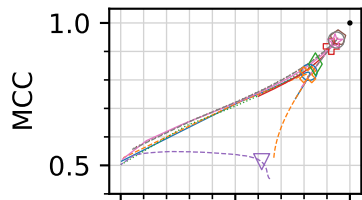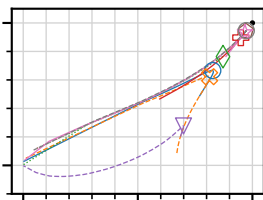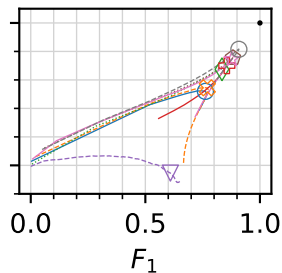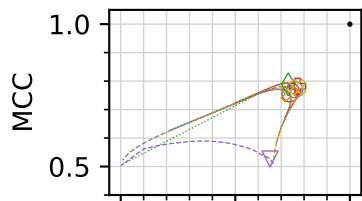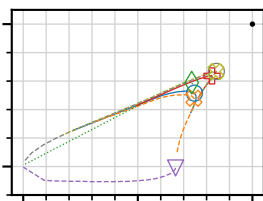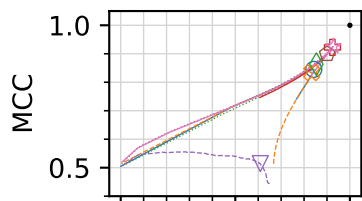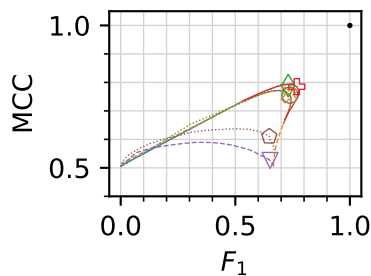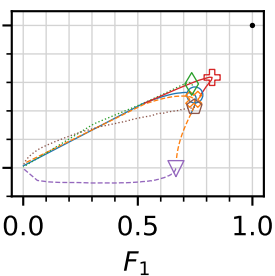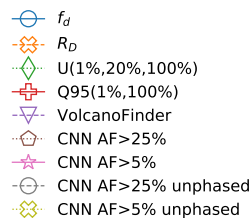

Model A1

Model B

weakly  
misspecified

strongly  
misspecified
