# Supplementary figures and images for: Detecting adaptive introgression in human evolution using convolutional neural networks
Source: eLife journal article supplement (doi:10.7554/elife.64669), 2021-05-25

## A. Demographic Model A1

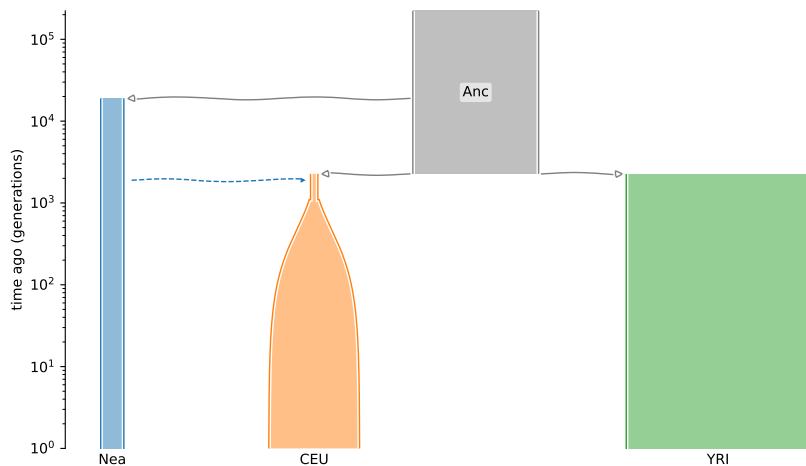

## B. Demographic Model A2

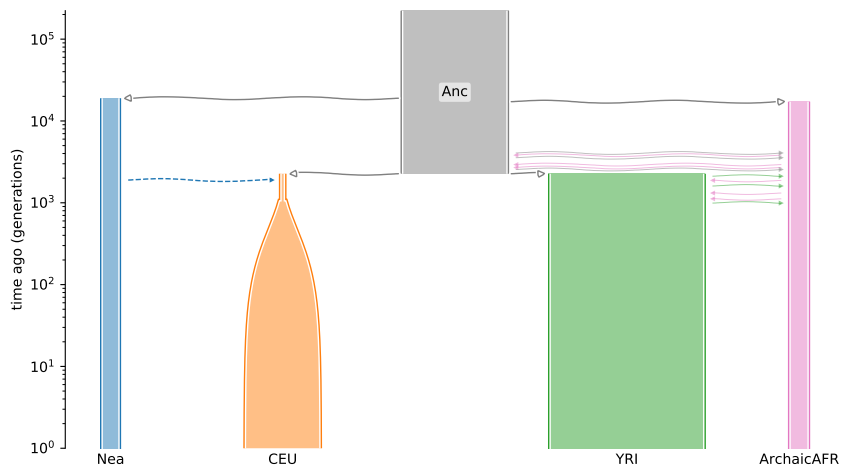

Supplement: supp [file elife-64669-supp-v1.zip › elife_poa_e64669_Figure_1_figure_supplement_1.pdf]

## A. Demographic Model B

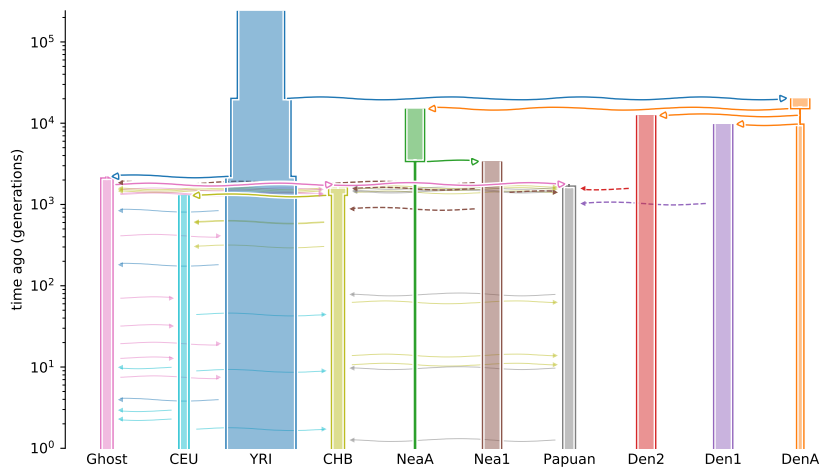

## B. Demographic Model B: zoomed to generations 800–2300

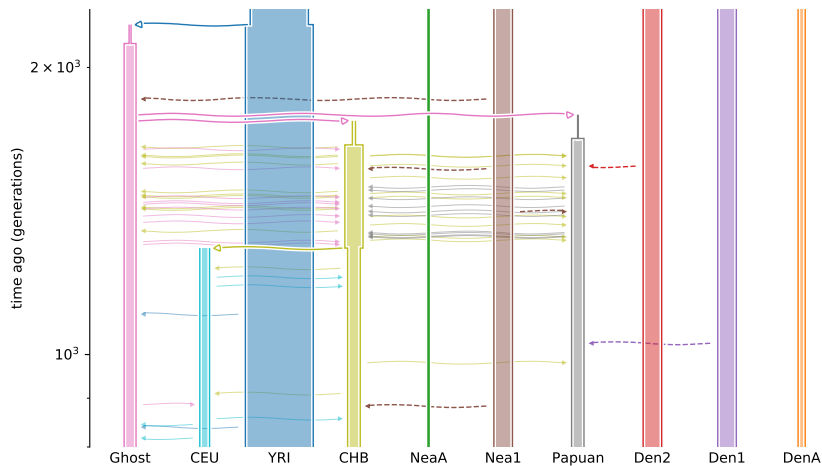

Supplement: supp [file elife-64669-supp-v1.zip › elife_poa_e64669_Figure_1_figure_supplement_2.pdf]

**A. Confusion matrix**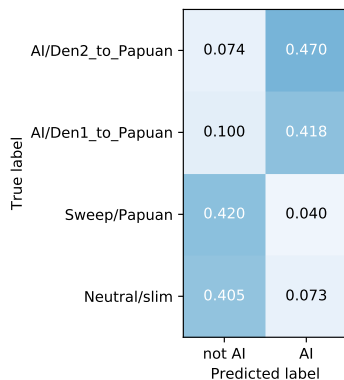**B. True positive rate / recall**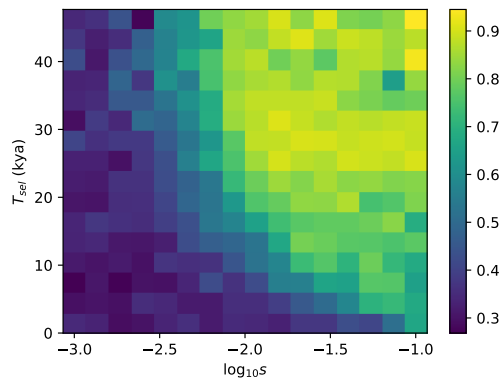**C**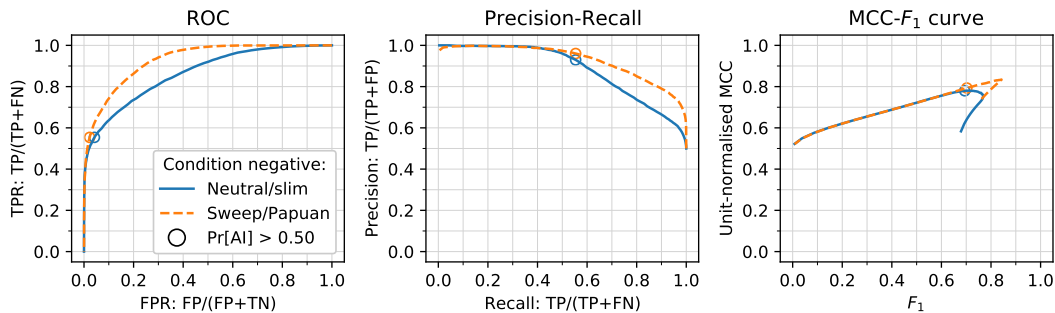

Supplement: supp [file elife-64669-supp-v1.zip › elife_poa_e64669_Figure_2_figure_supplement_1.pdf]

**A.** ratios 1:1:1

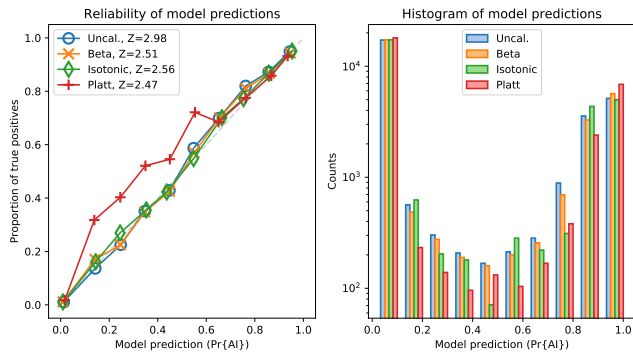

**B.** ratios 1:0.1:0.1

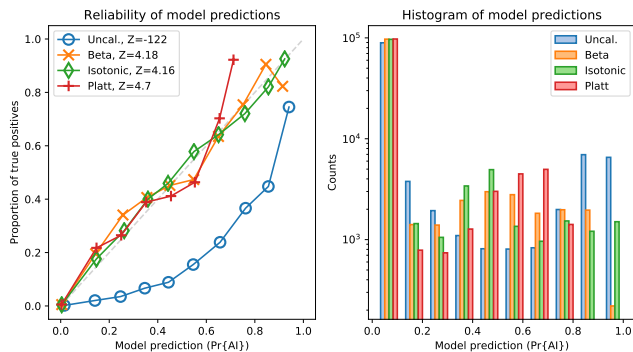

**C.** ratios 1:0.1:0.02

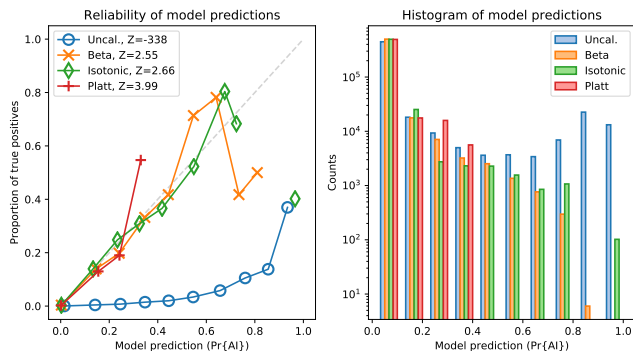

Supplement: supp [file elife-64669-supp-v1.zip › elife_poa_e64669_Figure_4_figure_supplement_1.pdf]

**A. ratios 1:1:1**

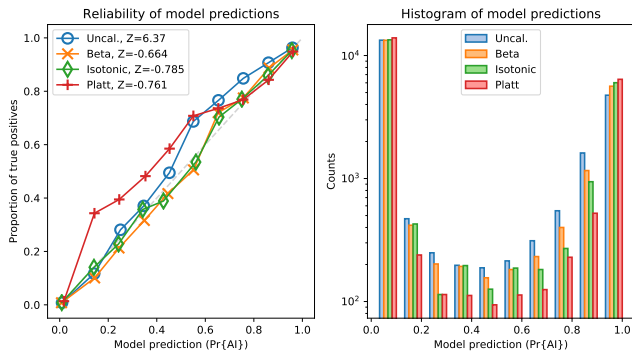

**B. ratios 1:0.1:0.1**

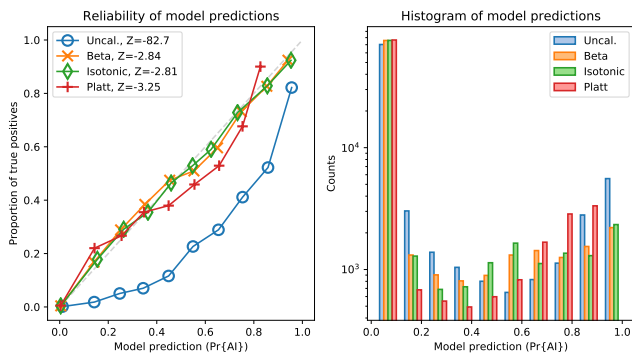

**C. ratios 1:0.1:0.02**

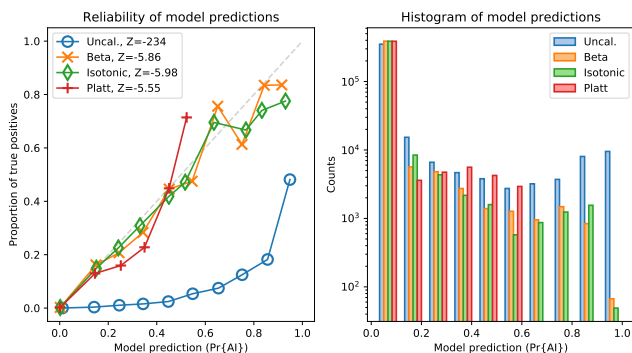

Supplement: supp [file elife-64669-supp-v1.zip › elife_poa_e64669_Figure_4_figure_supplement_2.pdf]

### B. ratios 1:0.1:0.1

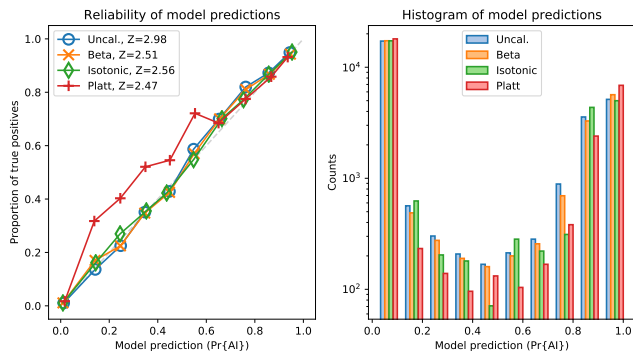

### B. ratios 1:0.1:0.1

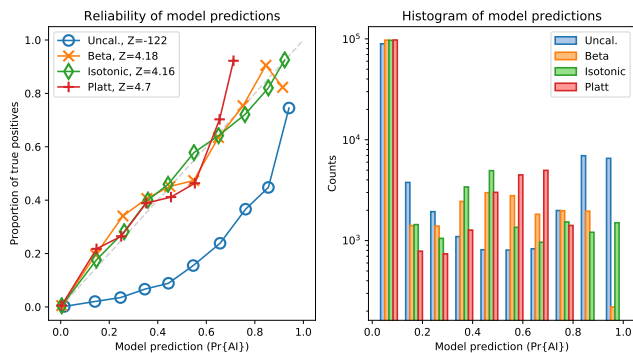

### C. ratios 1:0.1:0.02

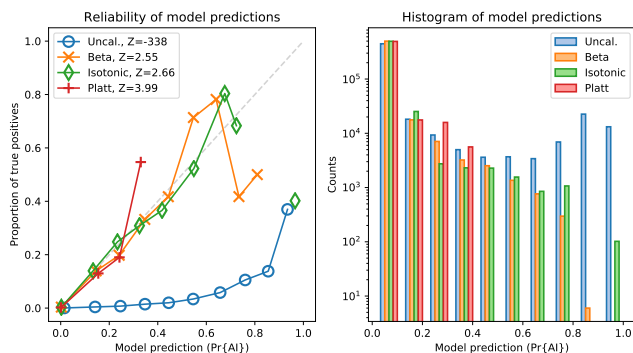

Supplement: supp [file elife-64669-supp-v1.zip › elife_poa_e64669_Figure_4_figure_supplement_3.pdf]

**A. ratios 1:1:1**

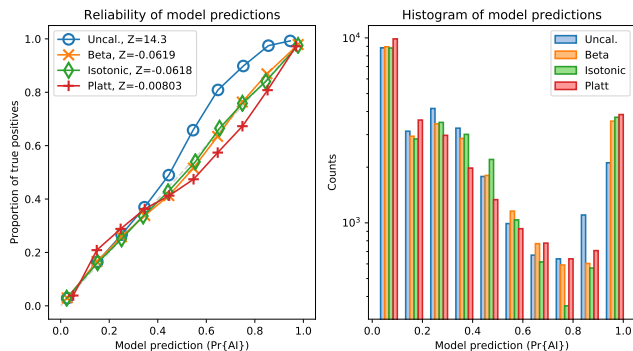

**B. ratios 1:0.1:0.1**

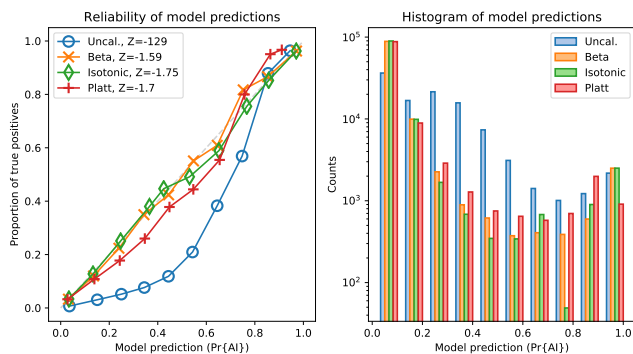

**C. ratios 1:0.1:0.02**

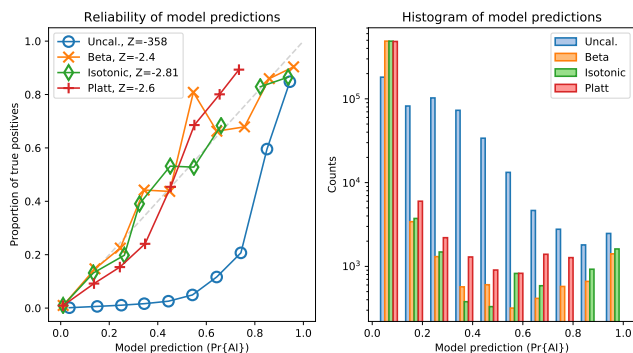

Supplement: supp [file elife-64669-supp-v1.zip › elife_poa_e64669_Figure_4_figure_supplement_4.pdf]

1:104500001-104600000

104598941

SNP position

104500360

Nea

CEU

YRI

Haplotypes

Minor

Allele

Major

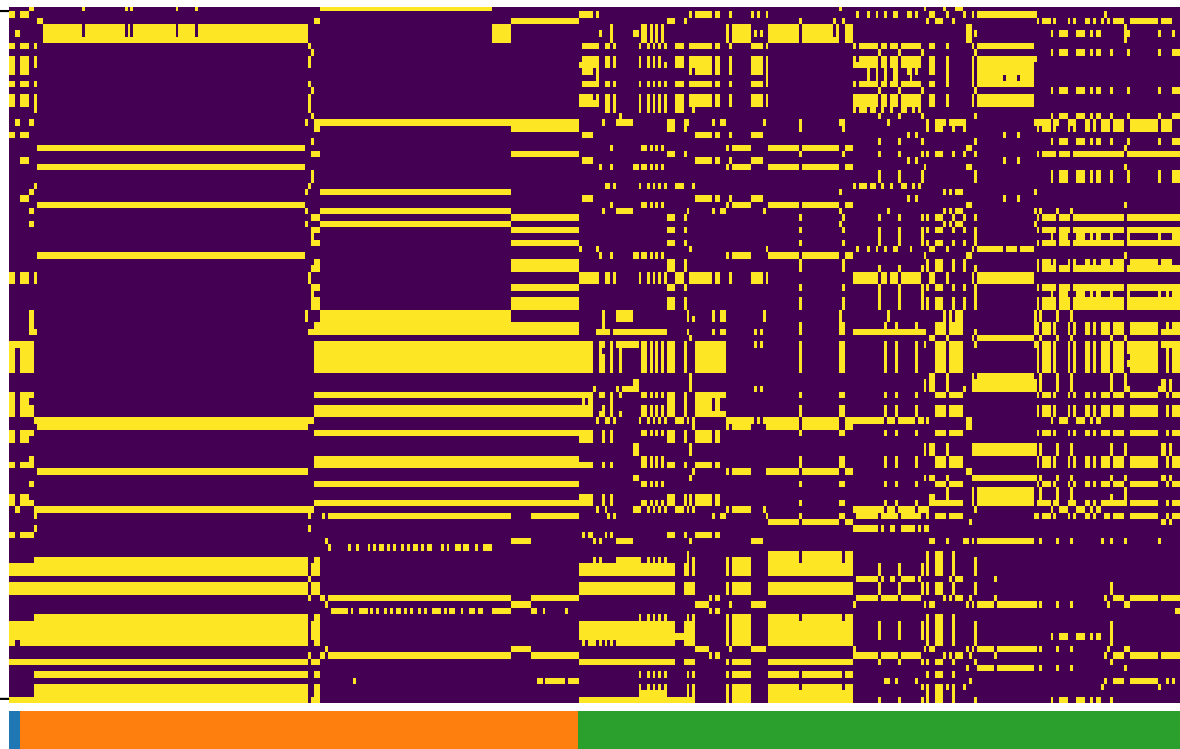

Supplement: supp [file elife-64669-supp-v1.zip › elife_poa_e64669_Appendix_4_figure_1.pdf]

2:109360001-109460000

109459574

SNP position

109389282

Nea

CEU

YRI

Haplotypes

Minor

Allele

Major

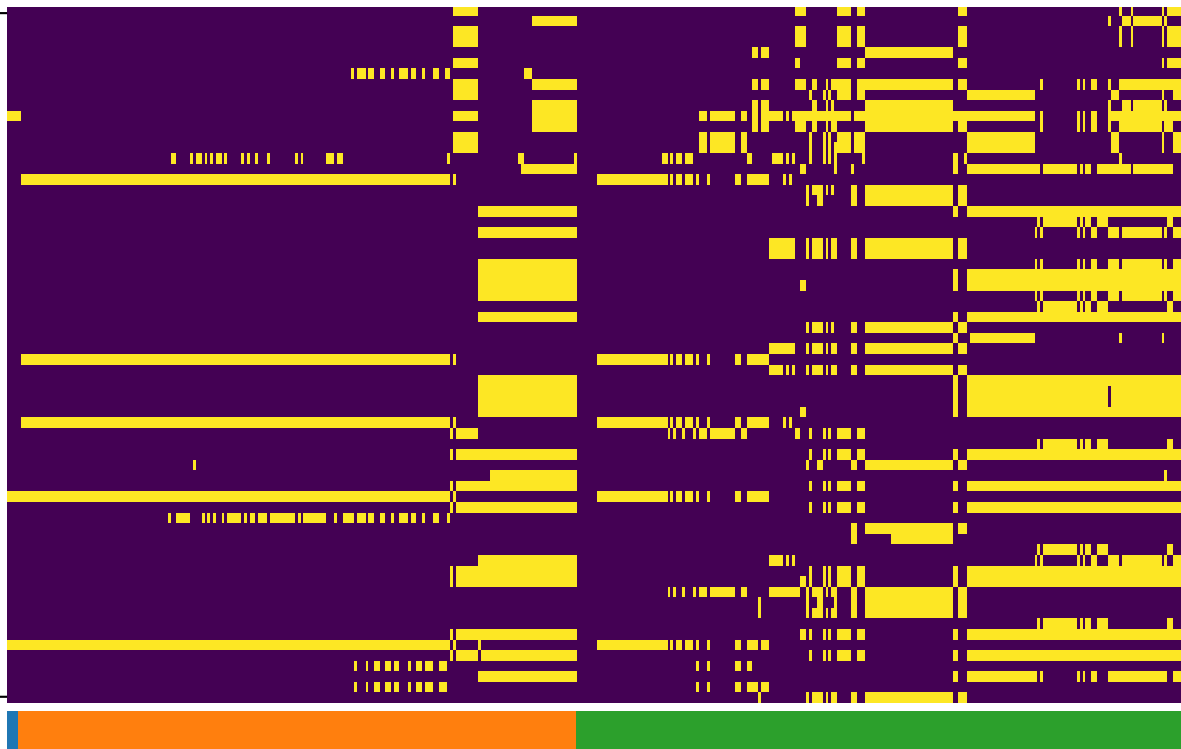

Supplement: supp [file elife-64669-supp-v1.zip › elife_poa_e64669_Appendix_4_figure_2.pdf]

2:160160001-160280000

160279430

SNP position

Minor

Allele

Major

160161700

Nea

CEU

YRI

Haplotypes

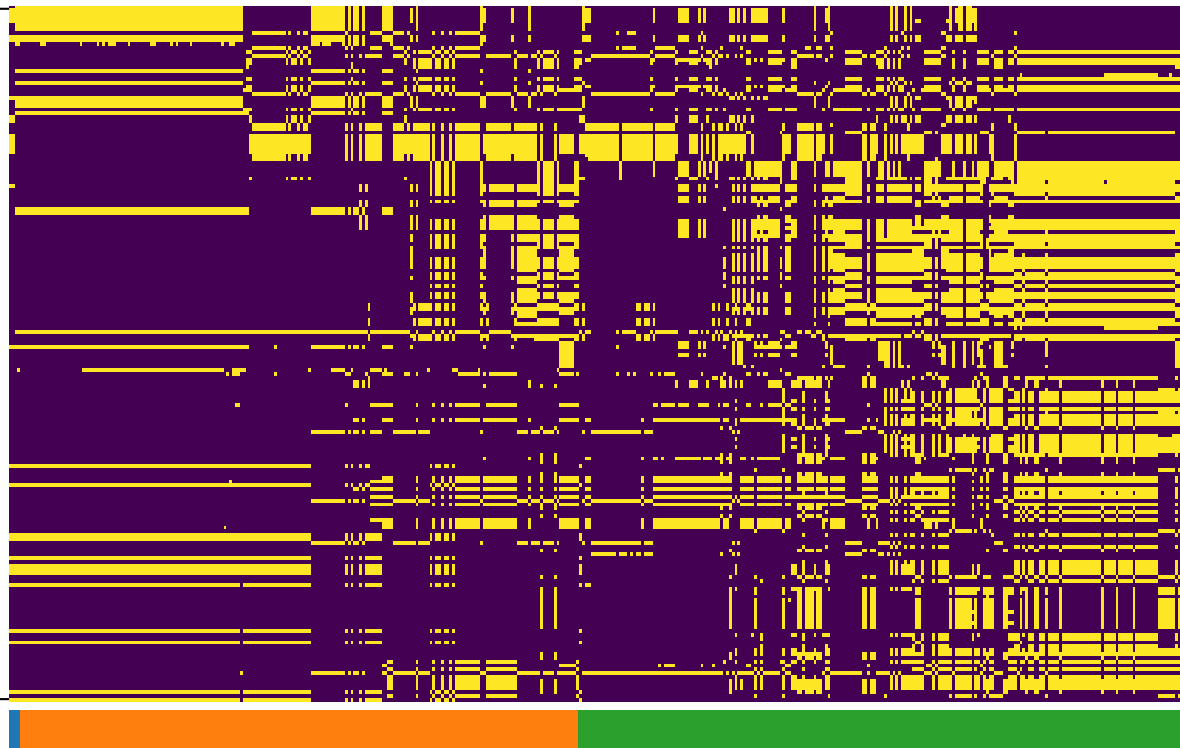

Supplement: supp [file elife-64669-supp-v1.zip › elife_poa_e64669_Appendix_4_figure_3.pdf]

3:114480001-114620000

114618833

SNP position

114480183

Nea

CEU

YRI

Haplotypes

Minor

Allele

Major

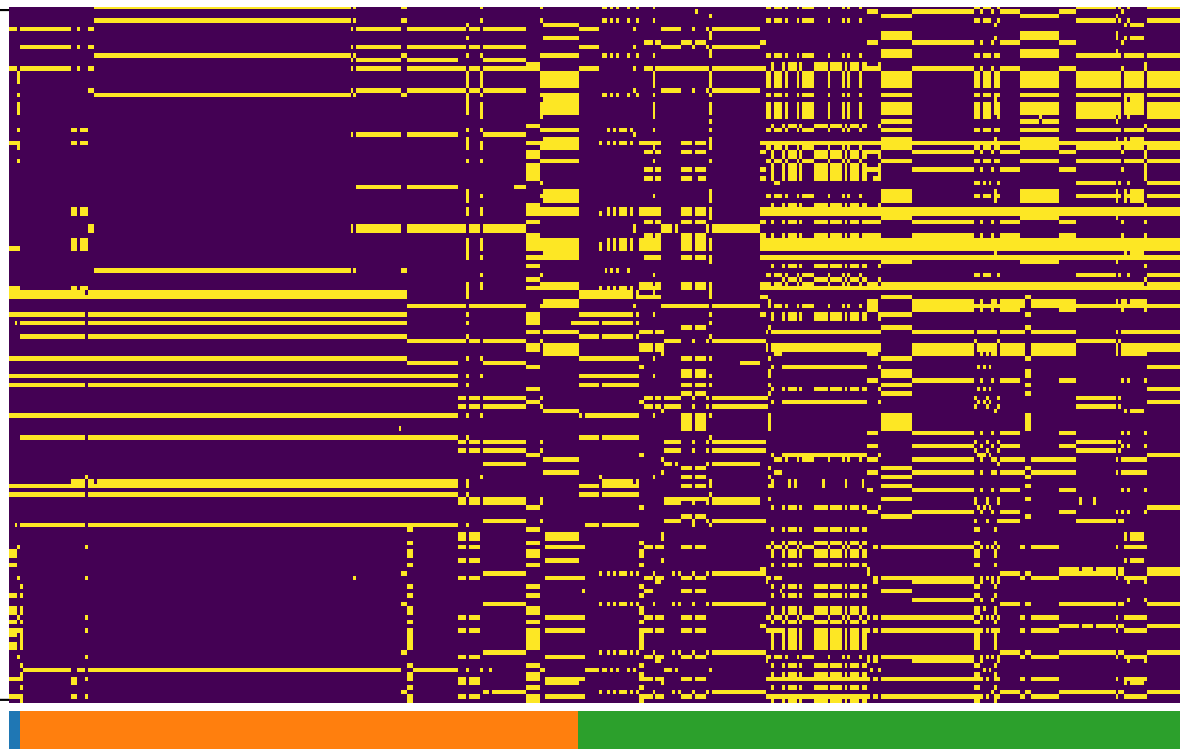

Supplement: supp [file elife-64669-supp-v1.zip › elife_poa_e64669_Appendix_4_figure_4.pdf]

4:54240001-54340000

54339478

SNP position

54243074

Minor

Allele

Major

Nea

CEU

YRI

Haplotypes

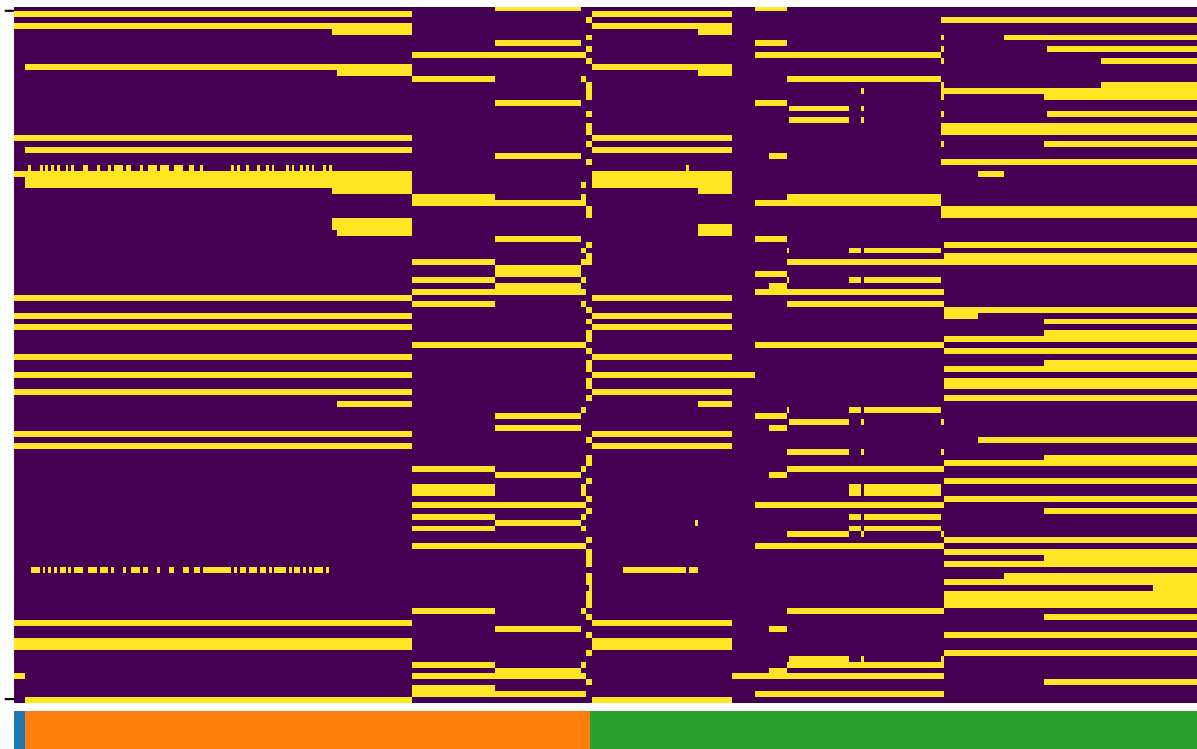

Supplement: supp [file elife-64669-supp-v1.zip › elife_poa_e64669_Appendix_4_figure_5.pdf]

5:39220001-39320000

39319762

SNP position

39220055

Minor

Allele

Major

Nea

CEU

YRI

Haplotypes

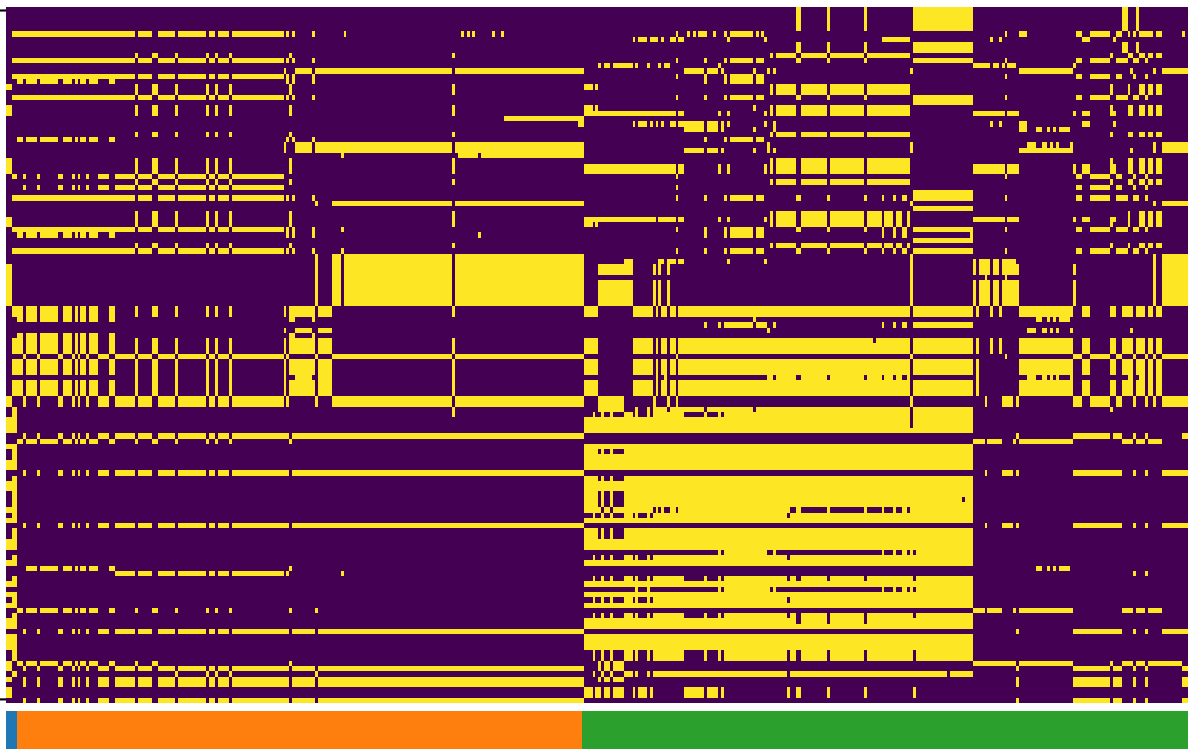

Supplement: supp [file elife-64669-supp-v1.zip › elife_poa_e64669_Appendix_4_figure_6.pdf]

6:28180001-28320000

28317536

SNP position

28184097

Minor

Allele

Major

Nea

CEU

YRI

Haplotypes

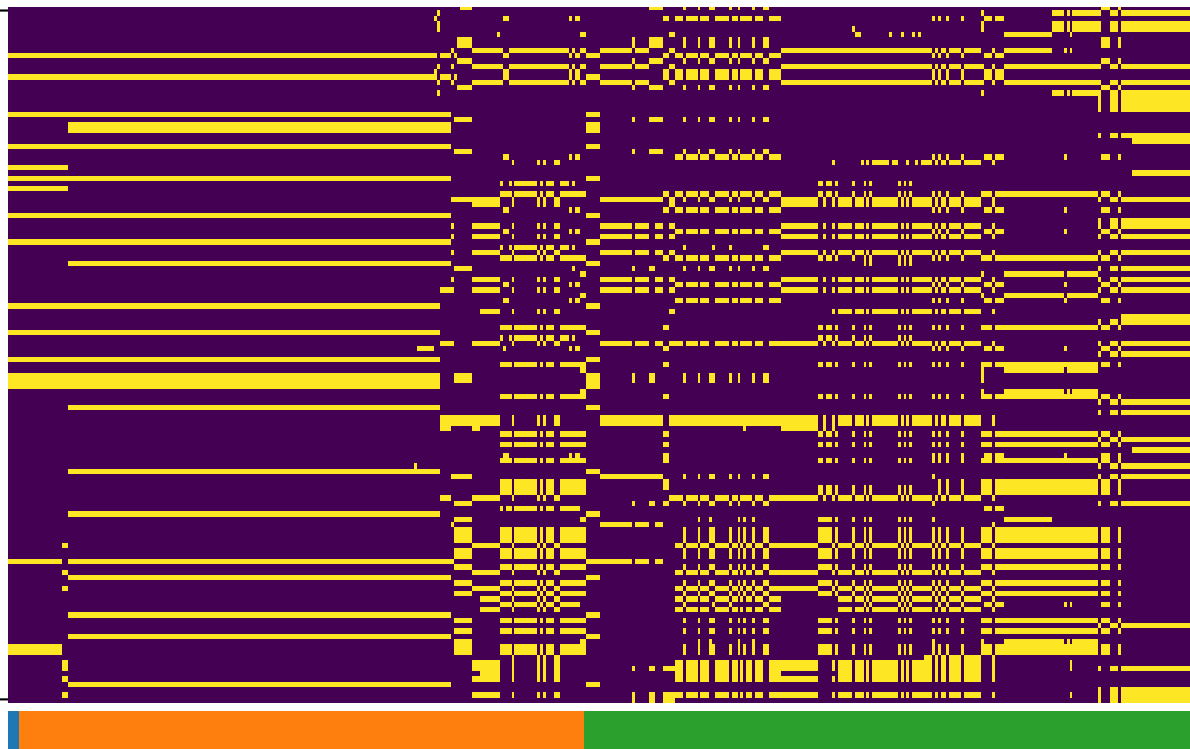

Supplement: supp [file elife-64669-supp-v1.zip › elife_poa_e64669_Appendix_4_figure_7.pdf]

8:143440001-143560000

143549725

SNP position

143440038

Nea

CEU

YRI

Haplotypes

Minor

Allele

Major

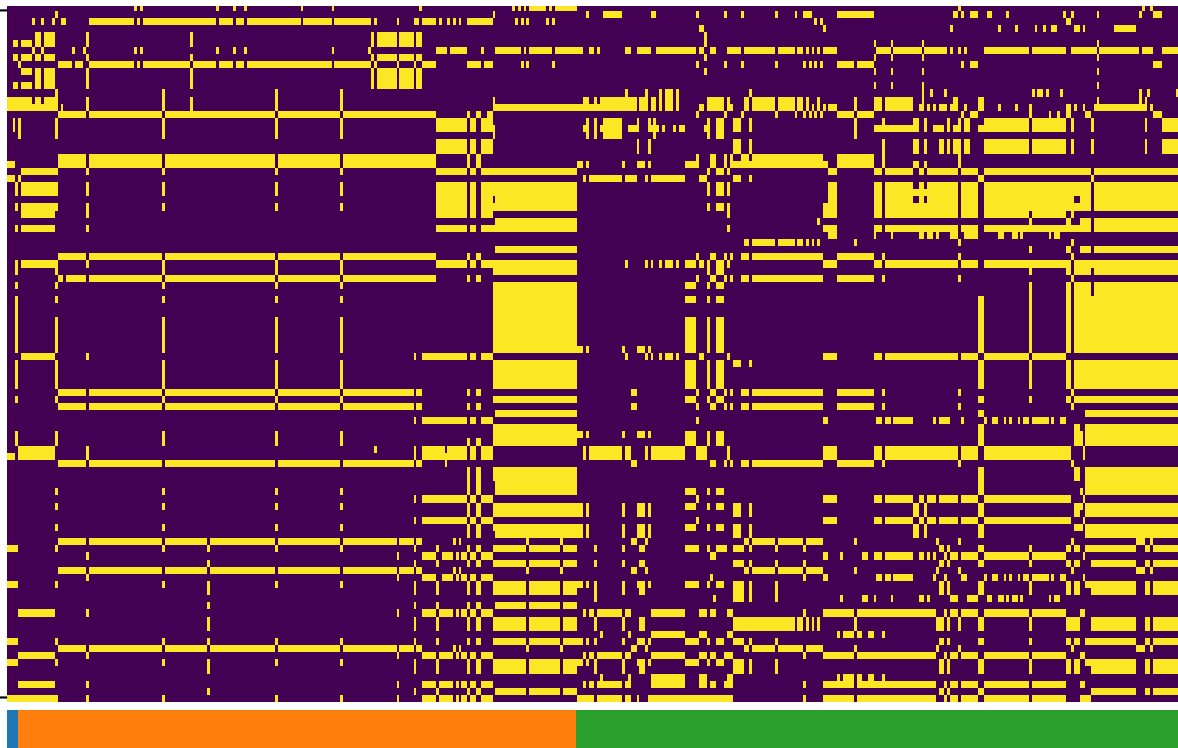

Supplement: supp [file elife-64669-supp-v1.zip › elife_poa_e64669_Appendix_4_figure_8.pdf]

9:16700001-16820000

16819282

SNP position

16700514

Minor

Allele

Major

Nea

CEU

YRI

Haplotypes

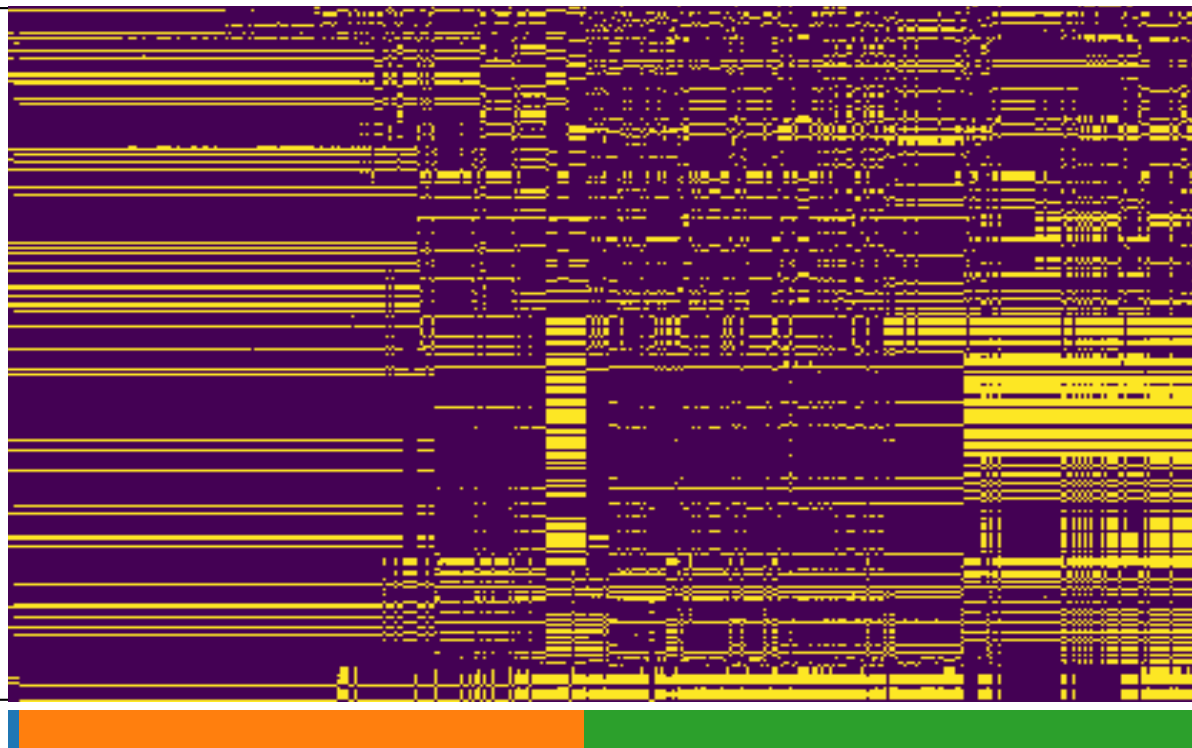

Supplement: supp [file elife-64669-supp-v1.zip › elife_poa_e64669_Appendix_4_figure_9.pdf]

12:85780001-85880000

85873291

SNP position

85782545

Minor

Allele

Major

Nea

CEU

YRI

Haplotypes

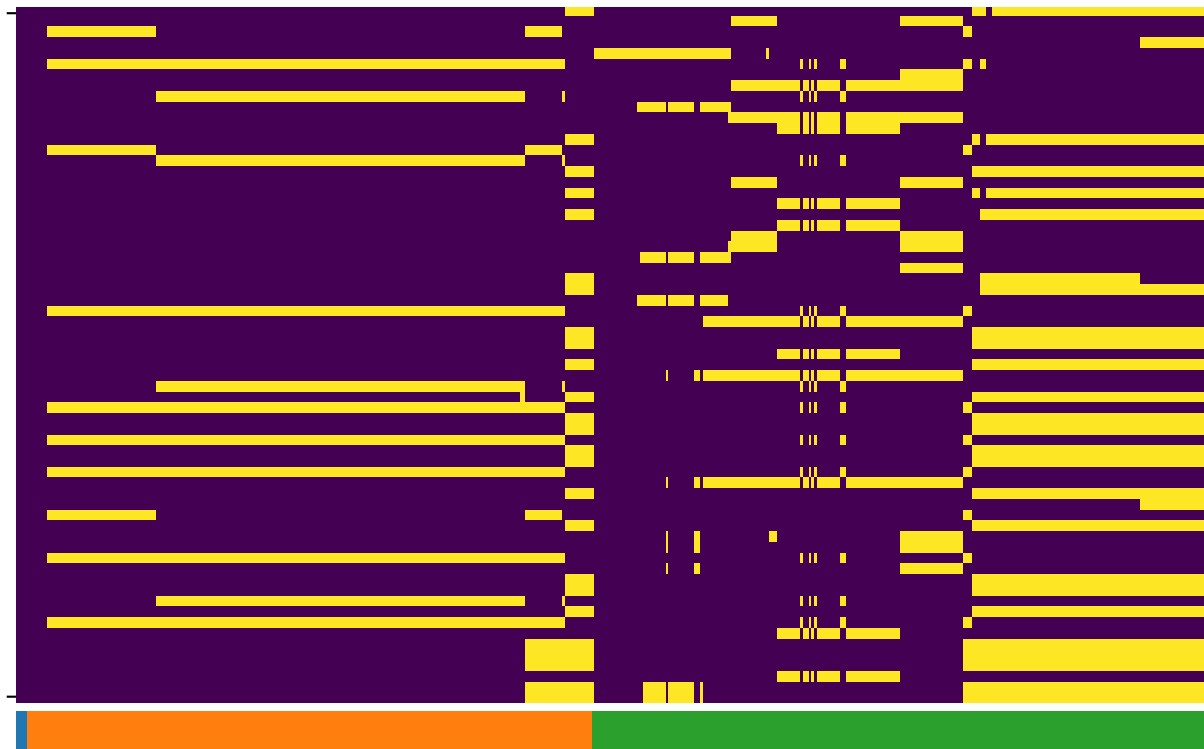

Supplement: supp [file elife-64669-supp-v1.zip › elife_poa_e64669_Appendix_4_figure_10.pdf]

19:20220001-20380000

20377154

SNP position

20221972

Minor

Allele

Major

Nea

CEU

YRI

Haplotypes

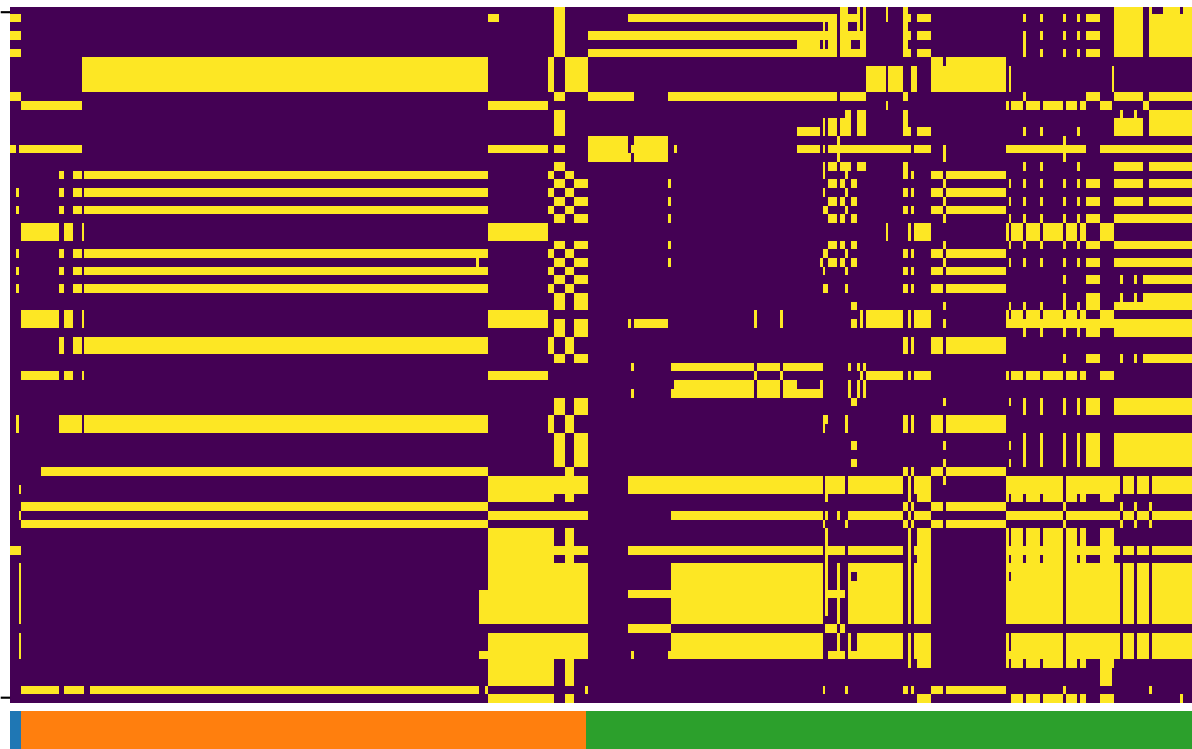

Supplement: supp [file elife-64669-supp-v1.zip › elife_poa_e64669_Appendix_4_figure_11.pdf]

19:33580001-33740000

33738185

SNP position

Minor

Allele

Major

33580453

Nea

CEU

YRI

Haplotypes

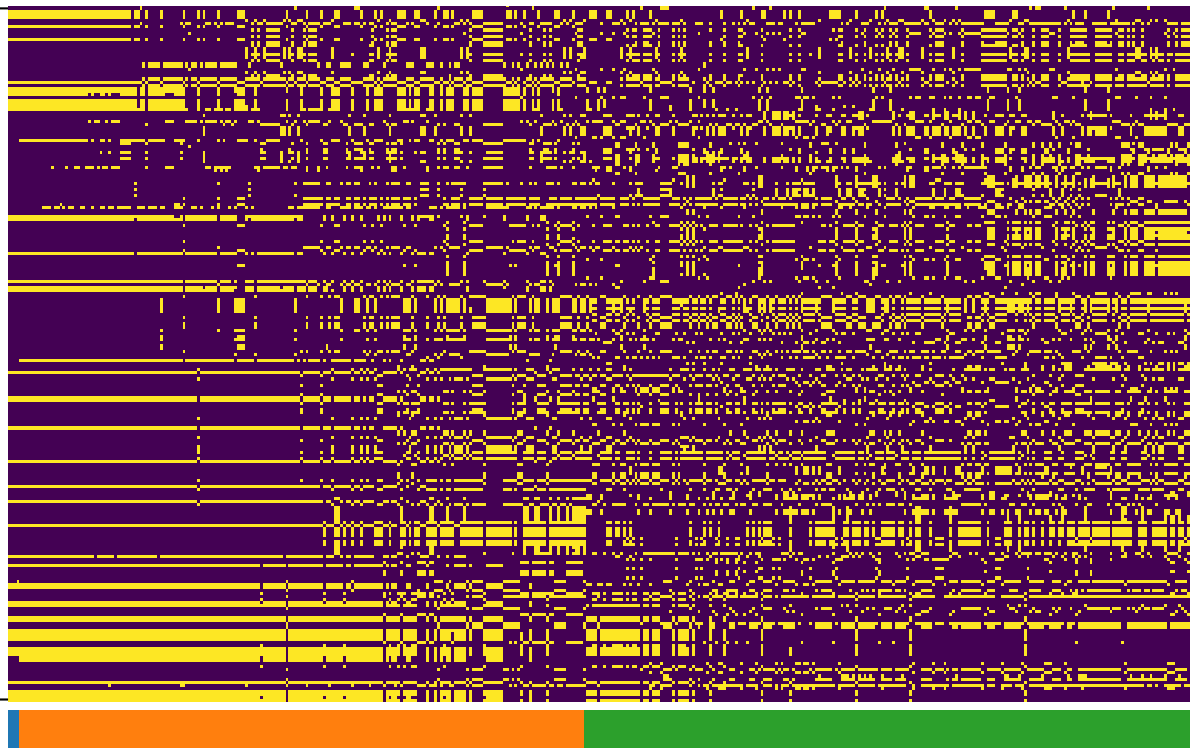

Supplement: supp [file elife-64669-supp-v1.zip › elife_poa_e64669_Appendix_4_figure_12.pdf]

20:62100001-62280000

62277675

SNP position

62100266

Minor

Allele

Major

Nea

CEU

YRI

Haplotypes

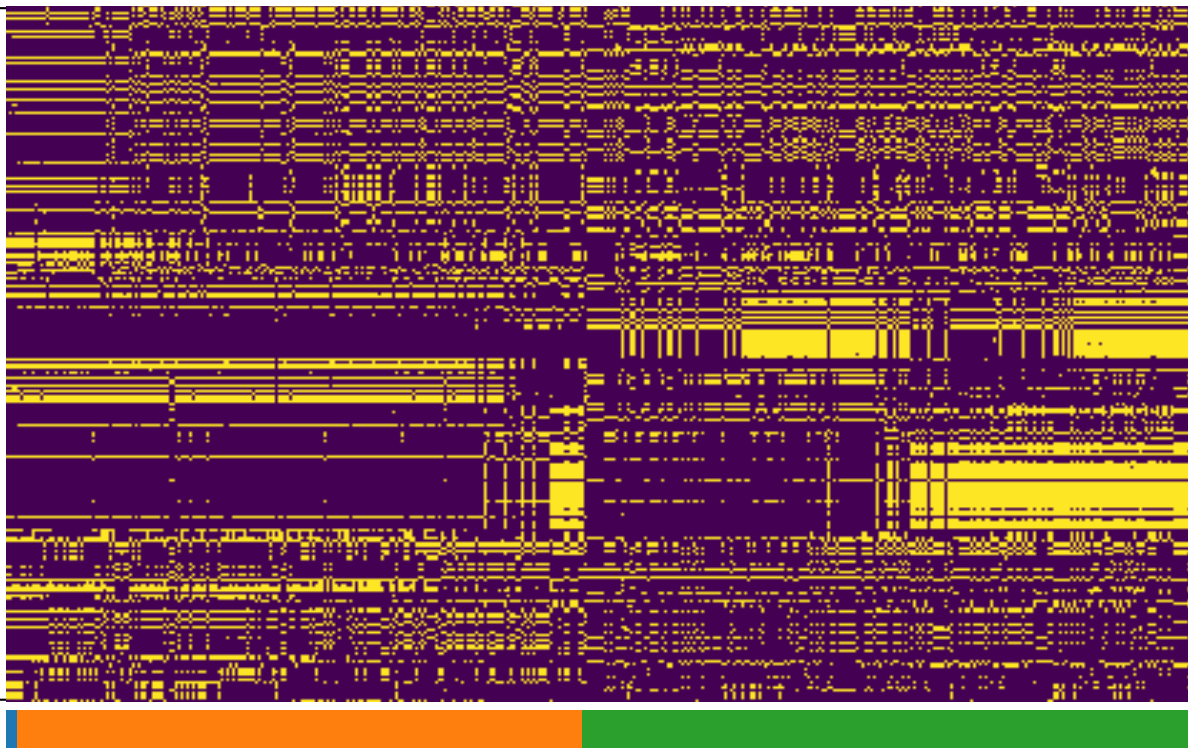

Supplement: supp [file elife-64669-supp-v1.zip › elife_poa_e64669_Appendix_4_figure_13.pdf]

21:25840001-25940000

25937804

SNP position

25840873

Minor

Allele

Major

Nea

CEU

YRI

Haplotypes

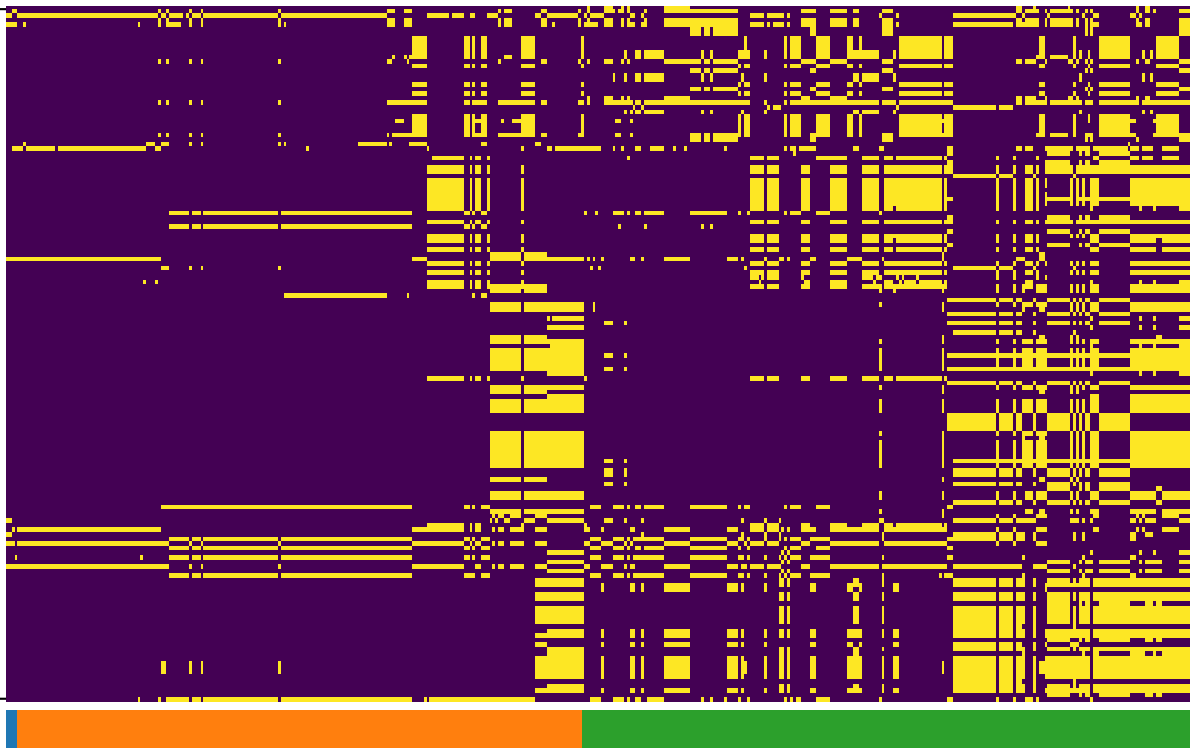

Supplement: supp [file elife-64669-supp-v1.zip › elife_poa_e64669_Appendix_4_figure_14.pdf]

3:3740001-3840000

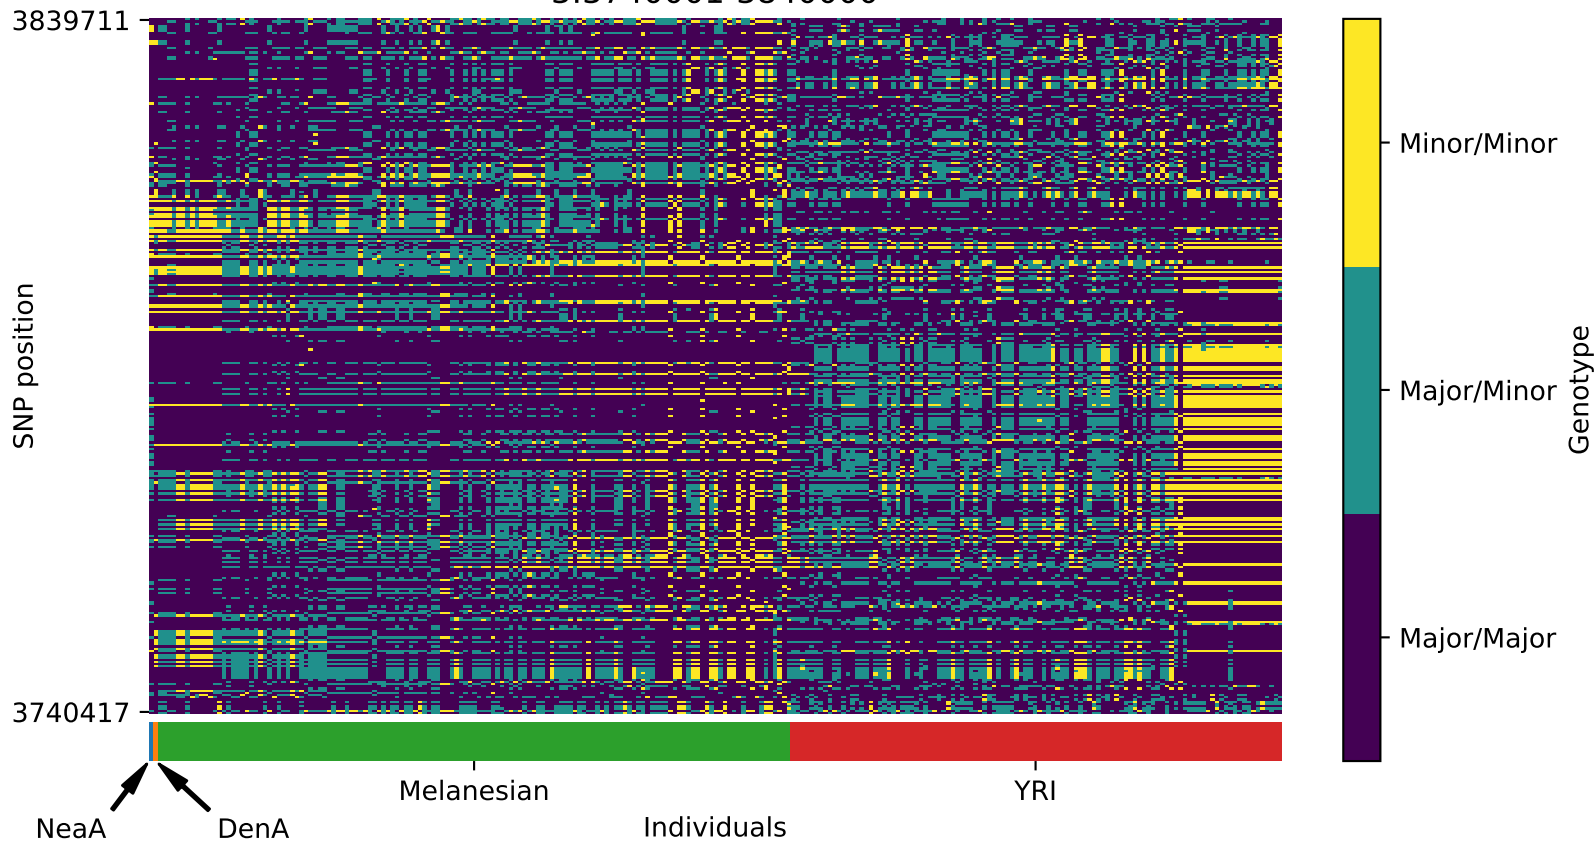

Supplement: supp [file elife-64669-supp-v1.zip › elife_poa_e64669_Appendix_5_figure_2.pdf]
